# Supplementary material for: Evaluation of parameters influencing the quality of colon preparation with a split-dose regimen of sulfate salts
Source: PubMed Central journal article supplement — Ann Gastroenterol. 2024 Feb 19;37(2):172–8. doi: 10.20524/aog.2024.0868 (PMC10927619; doi:10.20524/aog.2024.0868), 2024-02-19
Supplement: AnnGastroenterol-37-172_Suppl1.pdf [file AnnGastroenterol-37-172_Suppl1.pdf]

## Supplementary material

**Supplementary Table 1** Time between second dose of the laxative and colonoscopy for BBPS categories in 435 patients who underwent colonoscopy. Optimal preparation was defined as a sum=9. Suboptimal preparation was defined as a sum of 6, 7 or 8

| Time (h) | Optimal     | Suboptimal  | N         |
|----------|-------------|-------------|-----------|
| 2,3      | 11 (78.57)  | 3 (21.43)   | 14 (100)  |
| 3,4      | 36 (69.23)  | 16 (30.77)  | 52 (100)  |
| 4,5      | 98 (69.01)  | 44 (30.99)  | 142 (100) |
| 5,6      | 86 (64.18)  | 48 (35.82)  | 134 (100) |
| 6,7      | 35 (57.38)  | 26 (42.62)  | 61 (100)  |
| 7,8      | 8 (44.44)   | 10 (55.56)  | 18 (100)  |
| >8       | 5 (35.71)   | 9 (64.29)   | 14 (100)  |
| Total    | 279 (64.14) | 156 (35.86) | 435 (100) |

*BBPS, Boston Bowel preparation scale*

**Supplementary Table 2** Univariate analysis for factors associated with sub-optimal colon preparation. 435 patients underwent colonoscopy. \* $<0.1$ , \*\* $<0.05$ , \*\*\* $<0.01$

| Factors                             | OR        | 95%CI     | P-value  |
|-------------------------------------|-----------|-----------|----------|
| Age (years)                         | 1         | 0.98-1.02 | 0.82     |
| BMI (kg/m <sup>2</sup> )            | 1.05      | 1.01-1.1  | 0.03**   |
| Liquid intake (lt)                  | 1.05      | 0.85-1.29 | 0.66     |
| Time after second laxative dose (h) | 1.26      | 1.09-1.46 | 0.002*** |
| Sex                                 |           |           |          |
| Female                              | Reference |           |          |
| Male                                | 1.46      | 0.98-2.17 | 0.06*    |
| Digestive surgery                   |           |           |          |
| No                                  | Reference |           |          |
| Yes                                 | 1.15      | 0.74-1.79 | 0.53     |
| Abdominal surgery                   |           |           |          |
| No                                  | Reference |           |          |
| Yes                                 | 1.15      | 0.77-1.71 | 0.5      |
| Constipation                        |           |           |          |
| No                                  | Reference |           |          |
| Yes                                 | 0.77      | 0.4-1.46  | 0.42     |
| Diabetes                            |           |           |          |
| No                                  | Reference |           |          |
| Yes                                 | 0.79      | 0.42-1.51 | 0.48     |
| Indication                          |           |           |          |
| Screen                              | Reference |           |          |
| Re-exam polypectomy                 | 0.89      | 0.53-1.49 | 0.65     |
| Other                               | 0.85      | 0.54-1.33 | 0.47     |
| Hypothyroidism                      |           |           |          |
| No                                  | Reference |           |          |
| Yes                                 | 1.13      | 0.68-1.88 | 0.65     |
| Neurological drugs                  |           |           |          |
| No                                  | Reference |           |          |
| Yes                                 | 1.6       | 0.74-3.46 | 0.23     |
| Diet                                |           |           |          |
| No                                  | Reference |           |          |
| Yes                                 | 0.65      | 0.21-1.96 | 0.44     |
| Dulcolax                            |           |           |          |
| No                                  | Reference |           |          |
| Yes                                 | 0.78      | 0.44-1.38 | 0.39     |
| Adverse events                      |           |           |          |
| No                                  | Reference |           |          |
| Yes                                 | 1.34      | 0.77-2.32 | 0.3      |

OR, odds ratio; CI, confidence interval; BMI, body mass index

**Supplementary Table 3** Multivariate analysis for factors associated with suboptimal colon preparation in 435 patients who underwent colonoscopy. Data adjusted for age. \* $<0.1$ , \*\* $<0.05$ , \*\*\* $<0.01$

| Factors                             | OR   | 95%CI     | P-value  |
|-------------------------------------|------|-----------|----------|
| BMI (kg/m <sup>2</sup> )            | 1.05 | 1-1.1     | 0.03**   |
| Time after second laxative dose (h) | 1.25 | 1.08-1.45 | 0.003*** |

OR, odds ratio; CI, confidence interval; BMI, body mass index

**Supplementary Table 4** PDR and ADR proportions (95% confidence interval) for each region of the colon and total for 435 patients who underwent colonoscopy

| Proportions | Ascending colon     | Transverse and left colon | Total               |
|-------------|---------------------|---------------------------|---------------------|
| PDR         | 62.76 (58.03-67.32) | 57.47 (52.67-62.17)       | 80 (75.92-83.66)    |
| ADR         | 34.94 (30.46-39.63) | 29.89 (25.62-34.43)       | 48.74 (43.95-53.54) |

*PDR, polyp detection rate; ADR, adenoma detection rate*

**Supplementary Table 5** PDR and ADR for BBPS categories and Pearson  $\chi^2$  test for 435 patients who underwent colonoscopy

| Total | PDR                                              |                                                         | ADR                                                |                                                           |           |
|-------|--------------------------------------------------|---------------------------------------------------------|----------------------------------------------------|-----------------------------------------------------------|-----------|
|       | No. of colonoscopies without polyps detected (%) | No. of colonoscopies with at least 1 polyp detected (%) | No. of colonoscopies without adenomas detected (%) | No. of colonoscopies with at least 1 adenoma detected (%) |           |
| BBPS  | P-value=0.544                                    |                                                         | P-value=0.075                                      |                                                           |           |
| 6     | 10 (28.57)                                       | 25 (71.43)                                              | 23 (65.71)                                         | 12 (34.29)                                                | 35 (100)  |
| 7     | 10 (17.54)                                       | 47 (82.46)                                              | 23 (40.35)                                         | 34 (59.65)                                                | 57 (100)  |
| 8     | 14 (21.88)                                       | 50 (78.13)                                              | 29 (45.31)                                         | 35 (54.69)                                                | 64 (100)  |
| 9     | 53 (19)                                          | 226 (81)                                                | 148 (53.05)                                        | 131 (46.95)                                               | 279 (100) |
| Total | 87 (20)                                          | 348 (80)                                                | 223 (51.26)                                        | 212 (48.74)                                               | 435 (100) |

*PDR, polyp detection rate; ADR, adenoma detection rate; BBPS, Boston bowel preparation scale*
